# Supplementary material for: A facile synthesis of porous bimetallic Co–Ni fluorides for high-performance asymmetric supercapacitors
Source: Royal Society of Chemistry journal article supplement (doi:10.1039/d0nr01562h), 2020-01-01
Supplement: d0nr01562h1.pdf [file d0nr01562h1.pdf]

## Supporting Information

### **Facile Synthesis of Porous Bimetallic Co-Ni Fluorides for High-Performance Asymmetric Supercapacitors**

Xiaoya Zhou,<sup>a</sup> Xinyu Qu,<sup>a</sup> Wen Zhao,<sup>a</sup> Yanfang Ren,<sup>b</sup> Yao Lu,<sup>a</sup> Qian Wang,<sup>a\*</sup> Dapeng Yang,<sup>d\*</sup> Wenjun Wang,<sup>b</sup> Xiaochen Dong<sup>a,c\*</sup>

<sup>a</sup>Key Laboratory of Flexible Electronics (KLOFE) & Institute of Advanced Materials (IAM), School of Physical and Mathematical Sciences, Nanjing Tech University (NanjingTech), 30 South Puzhu Road, Nanjing 211800, China.

*E-mail: iamxcdong@njtech.edu.cn; chelseawq@njtech.edu.cn*

<sup>b</sup>School of Physical Science and Information Technology, Liaocheng University, Liaocheng 252059, China

<sup>c</sup>School of Chemistry and Materials Science, Nanjing University of Information Science & Technology, Nanjing 210044, China

<sup>d</sup>College of Chemical Engineering and Materials Science, Quanzhou Normal University, Quanzhou 362000, China

*E-mail: yangdp@qztc.edu.cn*

**Table S1.** Amount of metal acetate tetrahydrate added in synthesis of  $\text{Ni}_x\text{Co}_{(1-x)}\text{F}_2$ 

| Target composites<br>of $\text{Ni}_x\text{Co}_{(1-x)}\text{F}_2$ | Abbreviation | $\text{Co}(\text{CH}_3\text{COO})_2 \cdot 4\text{H}_2\text{O}$<br>(mmol) | $\text{Ni}(\text{CH}_3\text{COO})_2 \cdot 4\text{H}_2\text{O}$<br>(mmol) |
|------------------------------------------------------------------|--------------|--------------------------------------------------------------------------|--------------------------------------------------------------------------|
| $\text{CoF}_2$                                                   | NC-0-2       | 3                                                                        | 0                                                                        |
| $\text{Ni}_{1/3}\text{Co}_{2/3}\text{F}_2$                       | NC-1-2       | 2                                                                        | 1                                                                        |
| $\text{Ni}_{0.5}\text{Co}_{0.5}\text{F}_2$                       | NC-1-1       | 1.5                                                                      | 1.5                                                                      |
| $\text{Ni}_{2/3}\text{Co}_{1/3}\text{F}_2$                       | NC-2-1       | 2                                                                        | 2                                                                        |
| $\text{NiF}_2$                                                   | NC-2-0       | 0                                                                        | 3                                                                        |

**Table S2.** The length, width and aspect ratio of Ni-Co precursor

| Target composites | Length (nm) | Width (nm) | Aspect ratio |
|-------------------|-------------|------------|--------------|
| NC-0-2            | 1200        | 450        | 2.66         |
| NC-1-2            | 400         | 170        | 2.35         |
| NC-1-1            | 375         | 200        | 1.87         |
| NC-2-1            | 950         | 550        | 1.72         |
| NC-2-0            | 458         | 430        | 1.06         |

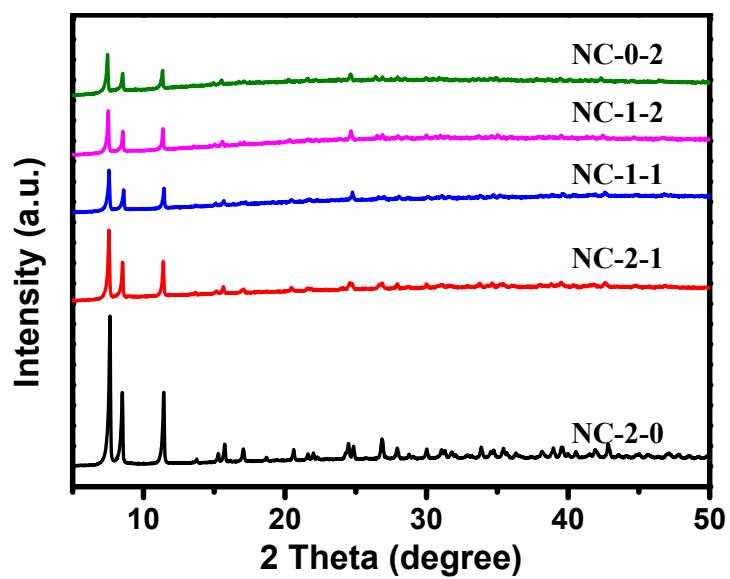

**Fig. S1** Ni-Co precursor XRD patterns with different ratios of Ni/Co.

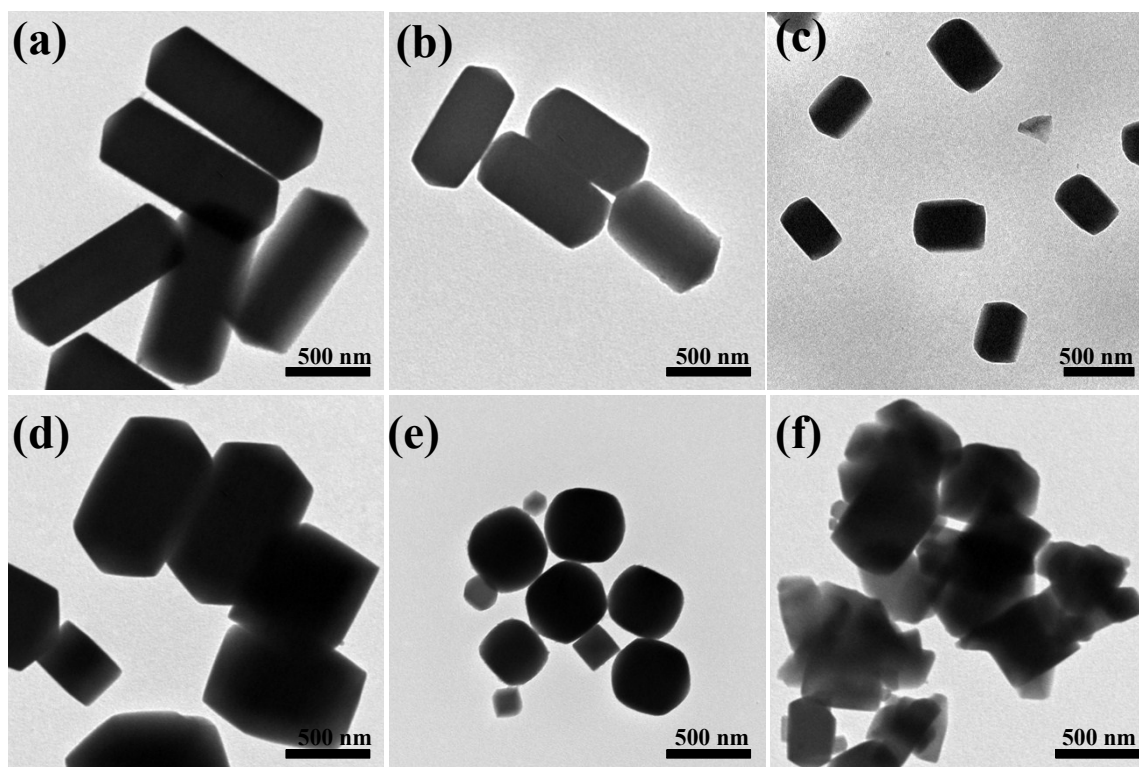

**Fig. S2** TEM images of Ni-Co precursor with different ratios. (a) NC-0-2, (b) NC-1-2, (c) NC-1-1, (d) NC-2-1, (e) NC-2-0, and (f) NC-1-1 without PVP.

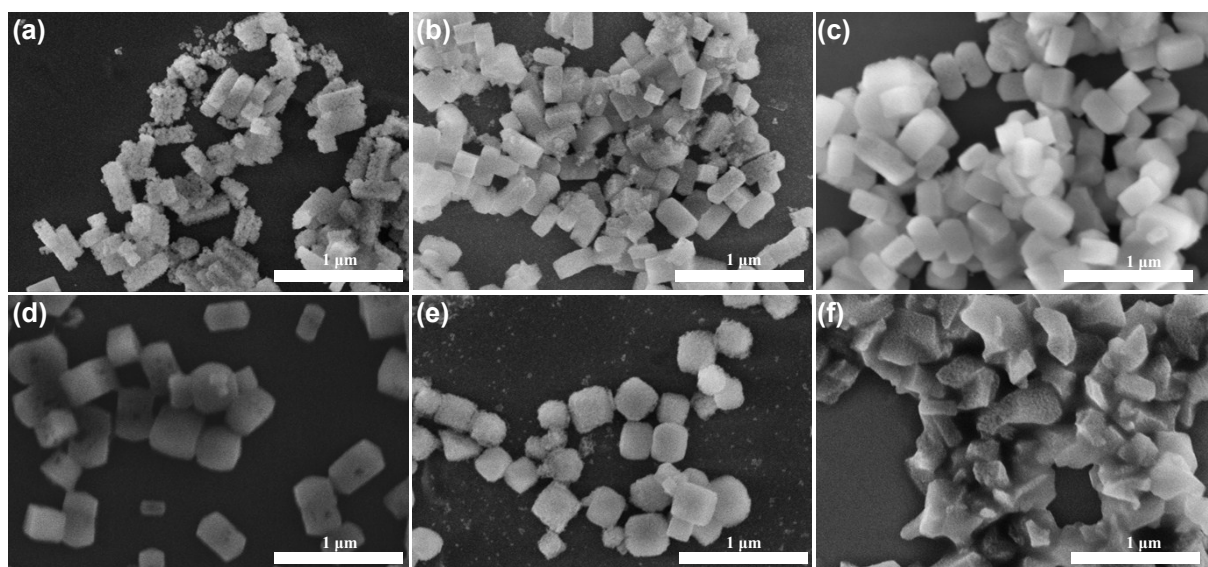

**Fig. S3** SEM images of Ni-Co-F with different ratio. (a) NCF-0-2, (b) NCF-1-2, (c) NCF-1-1, (d) NCF-2-1, (e) NCF-2-0, and (f) NCF-1-1 without PVP

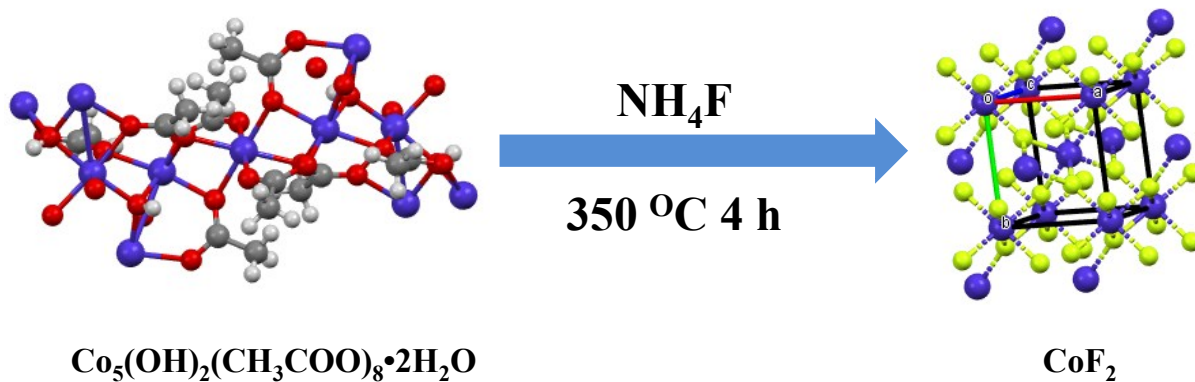

**Fig. S4.** Schematic illustration of the coordination structure transformation for Co precursors during the fluorination process.

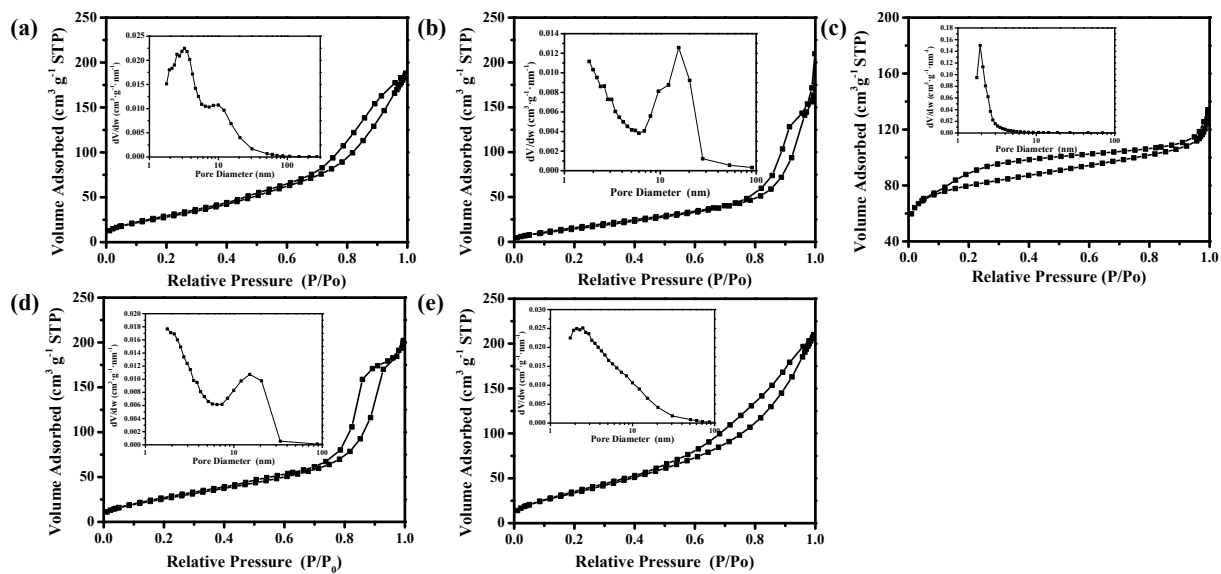

**Fig. S5.**  $N_2$  adsorption-desorption isotherms and pore size distributions of  $Ni_{1-x}Co_xF_2$ . (a) NCF-0-2, (b) NCF-1-2, (c) NCF-1-1, (d) NCF-2-1, and (e) NCF-2-0.

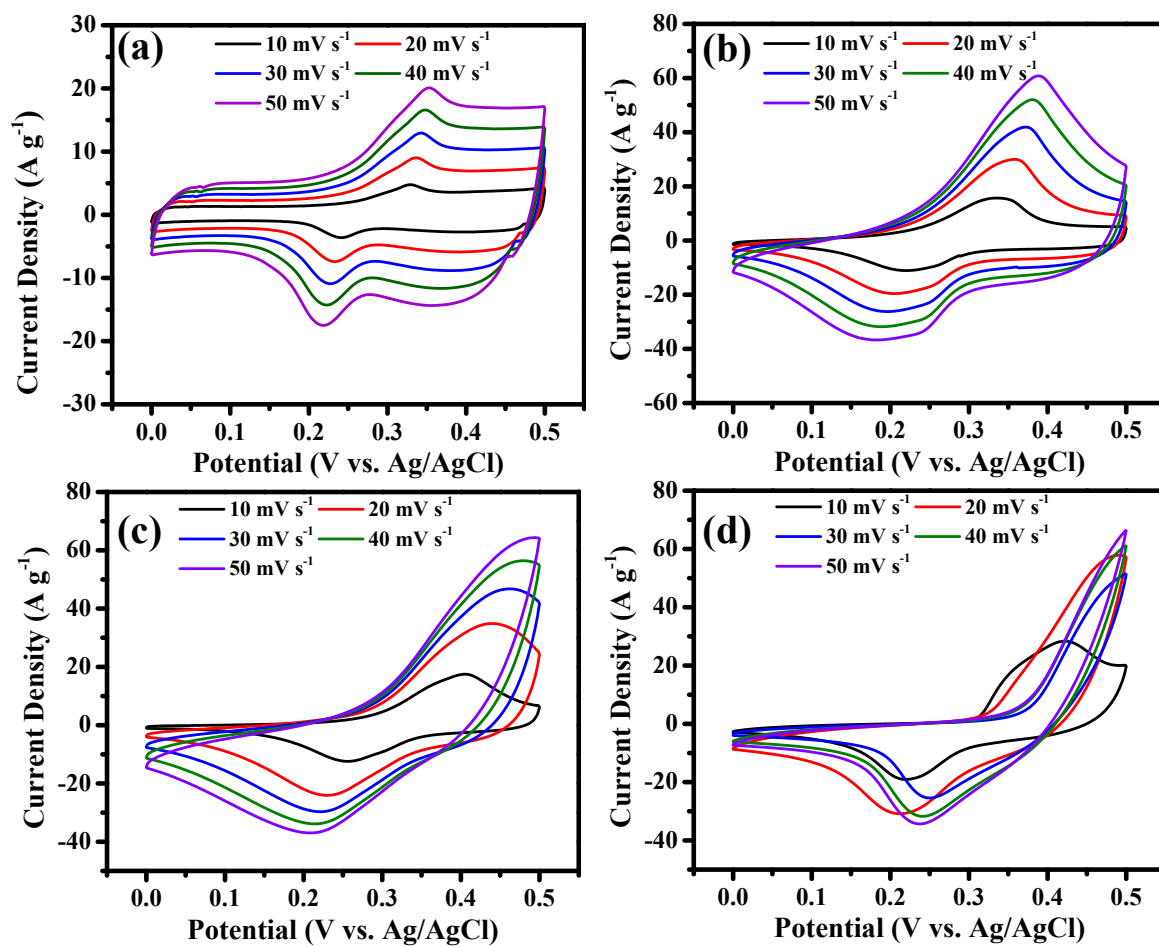

**Fig. S6** CV curves at different scan rates of (a) NCF-0-2, (b) NCF-1-2, (c) NCF-2-1 and (d) NCF-2-0.



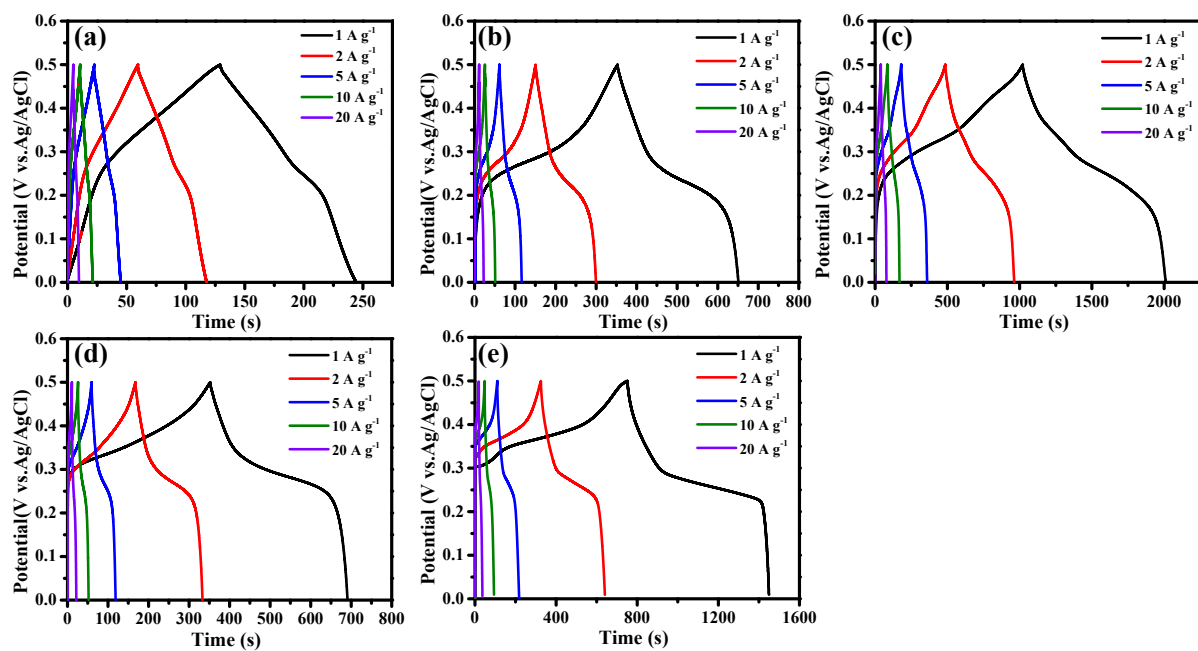

**Fig. S7** GCD curves at different current density of (a) NCF-0-2, (b) NCF-1-2, (c) NCF-1-1, (d) NCF-2-1 and (e) NCF-2-0.

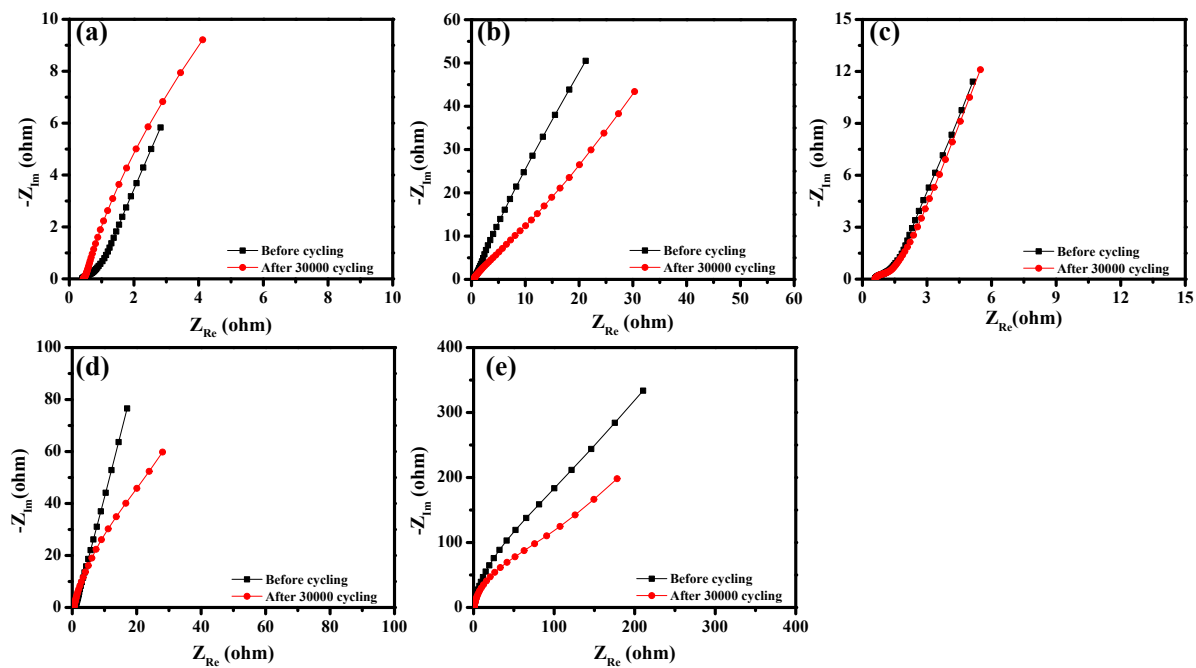

**Fig. S8** Nyquist plots of (a) NCF-0-2, (b) NCF-1-2, (c) NCF-1-1, (d) NCF-2-1 and (e) NCF-2-0.

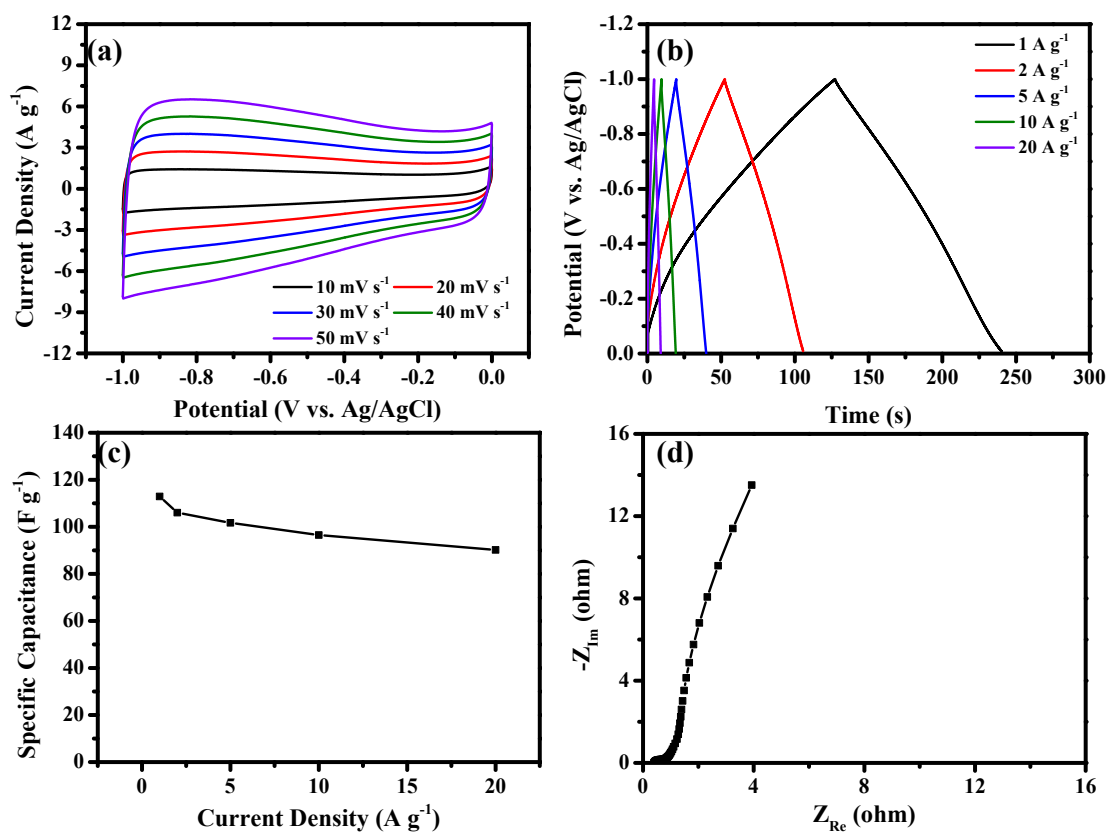

**Fig. S9** The electrochemical performances of AC electrode. (a) CV curves at different scanning rates. (b) GCD curves at different current densities. (c) Specific capacitance as a function of current density and (d) Nyquist plots.

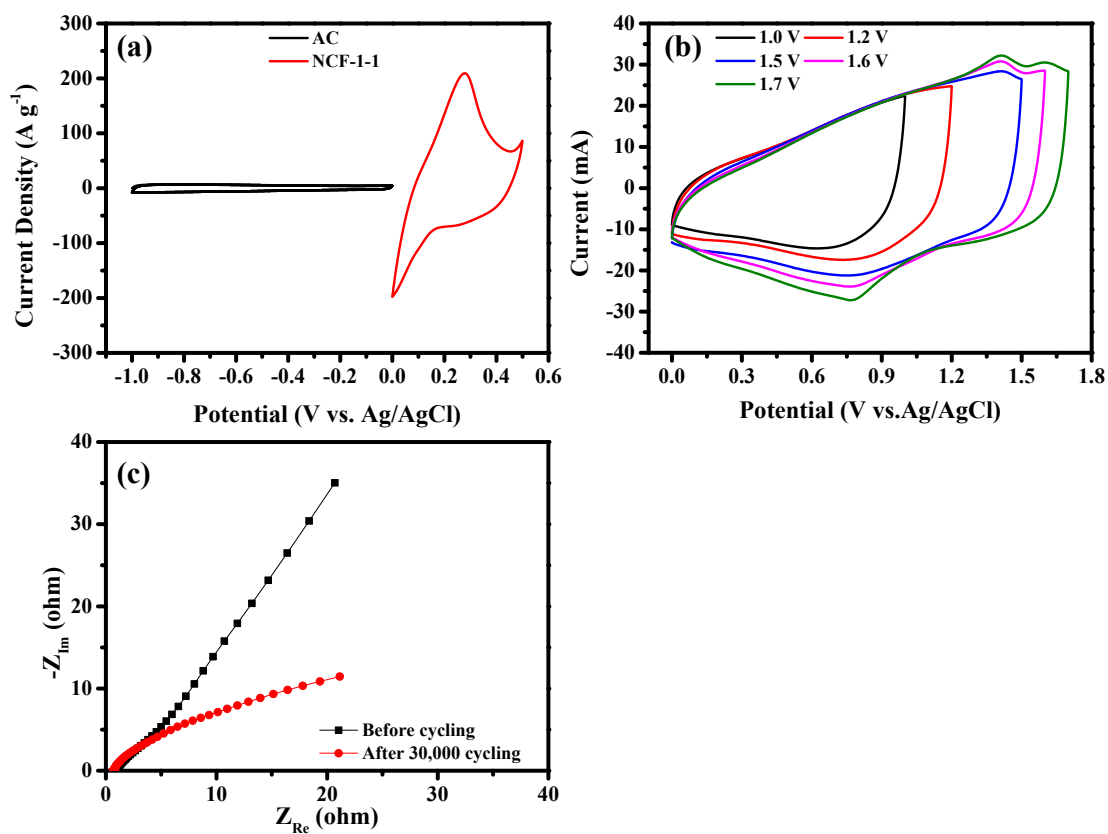

**Fig. S10.** The electrochemical performance of the asymmetric device NCF-1-1//AC. (a) CV profiles of the two electrodes at the same scan rate of  $50 \text{ mV s}^{-1}$ . (b) CV curves of the device with different voltage windows at the scan rate of  $50 \text{ mV s}^{-1}$ , and (c) EIS results of NCF-1-1//KOH//AC.

Table S3. Comparison of energy density and power density of different electrode materials

| Materials                                                                         | Energy density<br>(Wh kg <sup>-1</sup> ) | Power density<br>(W kg <sup>-1</sup> ) | References |
|-----------------------------------------------------------------------------------|------------------------------------------|----------------------------------------|------------|
| C-doped CFMP//NG                                                                  | 53.2                                     | 399.7                                  | Ref. 1     |
| Co <sub>3</sub> O <sub>4</sub> //AC                                               | 46.5                                     | 790.7                                  | Ref. 2     |
| ZnCo <sub>2</sub> O <sub>4</sub> @Ni(OH) <sub>2</sub> //AC                        | 40.0                                     | 802.7                                  | Ref. 3     |
| NiMoO <sub>4</sub> @NiS <sub>2</sub> /MoS <sub>2</sub> //AC                       | 26.8                                     | 700                                    | Ref. 4     |
| NiCo <sub>2</sub> S <sub>4</sub> @NiS//AC                                         | 62.4                                     | 800                                    | Ref. 5     |
| N-GNTs@sd-<br>Co <sub>9</sub> S <sub>8</sub> /Ni <sub>3</sub> S <sub>2</sub> //AC | 45.1                                     | 3400                                   | Ref. 6     |

## References

1. R. Niu, G. Wang, Y. Ding, S. Tang, X. Hu and J. Zhu, *J. Mater. Chem. A*, 2019, **7**, 4431-4437.
2. G. Wei, Z. Zhou, X. Zhao, W. Zhang and C. An, *ACS Appl. Mater. Interfaces*, 2018, **10**, 23721-23730.
3. X. Han, Y. Yang, J.-J. Zhou, Q. Ma and L. Han, *Chem.-Eur. J.*, 2018, **24**, 18106-18114.
4. D. Chen, M. Lu, L. Li, D. Cai, J. Li, J. Cao and W. Han, *J. Mater. Chem. A*, 2019, **7**, 21759-21765.
5. Qu, G., Li, C., Hou, P., Zhao, G., Wang, X., Zhang, X., & Xu, X. *Nanoscale*, 2020, **12**, 4686-4694.
6. J. Zhao, G. Song, X. Yuan, T. Shen, Q. Jiang, A. Meng, Y. Lin, Z. Li and Q. Li, *Sci. China Technol. Sc.*, 2020, 1-11.
